# Supplementary material
Source: PubMed Central journal article supplement (PMC8629134)
Supplement: NIHMS1754226-supplement-Supp_Tables_final.pdf [file NIHMS1754226-supplement-Supp_Tables_final.pdf]

**Supplementary Table 1: LEGEND-Screen™ Mouse PE Kit**

| Antibody   | Antibody    | Antibody     | Antibody  | Antibody                  | Antibody                            | Antibody                     |
|------------|-------------|--------------|-----------|---------------------------|-------------------------------------|------------------------------|
| CD1d       | CD49a       | CD117        | CD200R    | Allergin-1                | Ly49H                               | TCR V $\gamma$ 2             |
| CD2        | CD49b(DX5)  | CD120a       | CD200R3   | B7-H4                     | Ly-51                               | TCR V $\gamma$ 3             |
| CD3        | CD49b(HMa2) | CD120b       | CD201     | CLEC12A                   | Ly-6A/E                             | TCR V $\delta$ 4             |
| CD4        | CD49d       | CD121a       | CD202b    | CLEC9A                    | Ly-6C                               | TCR $\beta$ chain            |
| CD5        | CD49e       | CD122        | CD205     | CMKLR1                    | Ly-6D                               | TER-119                      |
| CD6        | CD49f       | CD123        | CD206     | CXCR7                     | Ly-6G                               | TIGIT                        |
| CD8a       | CD51        | CD124        | CD207     | 33D1                      | Ly-6G/Ly-6C                         | Tim-1                        |
| CD9        | CD54        | CD126        | CD210     | DeTRAIL-R1                | Mac-2                               | Tim-2                        |
| CD11a      | CD55        | CD127        | CD223     | DeTRAIL-R2                | MAIR-IV                             | Tim-3                        |
| CD11b      | CD59a       | CD132        | CD226     | Dectin-1                  | MD-1                                | Tim-4                        |
| CD11c      | CD61        | CD133        | CD229     | Delta-like 1              | NK-1.1                              | TLT-2                        |
| CD14       | CD62L       | CD134        | CD252     | Delta-like 4              | Notch 1                             | Trem-like 4                  |
| CD16/32    | CD63        | CD135        | CD253     | DR3                       | Notch 2                             | IgG Isotype Ctrl             |
| CD18       | CD64        | CD137        | CD254     | ESAM                      | Notch 3                             | IgG Isotype Ctrl             |
| CD19       | CD66a       | 4-1BB Ligand | CD255     | F4/80                     | Notch 4                             | IgG1, $\kappa$ Isotype Ctrl  |
| CD21/CD35  | CD68        | CD138        | CD256     | Fc $\epsilon$ R1 $\alpha$ | PD-1H                               | IgG2a, $\kappa$ Isotype Ctrl |
| CD22       | CD69        | CD140a       | CD262     | FR4                       | PDC-TREM                            | IgG2b, $\kappa$ Isotype Ctrl |
| CD23       | CD70        | CD140b       | CD265     | Galectin-9                | PIR-A/B                             | IgM, $\kappa$ Isotype Ctrl   |
| CD24       | CD71        | CD144        | CD266     | GARP                      | Podoplanin                          | IgG1, $\kappa$ Isotype Ctrl  |
| CD25       | CD73        | CD146        | CD267     | GITR Ligand               | RAE-1 $\gamma$                      | IgG2a, $\kappa$ Isotype Ctrl |
| CD26       | CD79a       | CD147        | CD268     | H-2                       | RAE-1 $\delta$                      | IgG2b, $\kappa$ Isotype Ctrl |
| CD27       | CD79b       | CD150        | HVEM      | I-A/I-E                   | Siglec H                            | IgG2c,k Isotype Ctrl         |
| CD28       | CD80        | CD152        | CD272     | IFNAR-1                   | SSEA-1                              | IgM, $\kappa$ Isotype Ctrl   |
| CD29       | CD81        | CD153        | CD273     | IFN- $\gamma$ R b chain   | SSEA-3                              |                              |
| CD30       | CD83        | CD154        | CD274     | IgD                       | TCR $\gamma/\delta$                 |                              |
| CD31       | CD84        | CD155        | CD275     | IgE                       | TCR V $\alpha$ 11                   |                              |
| CD34       | CD86        | CD157        | CD276     | IgM                       | TCR V $\alpha$ 2                    |                              |
| CD36       | CD88        | CD160        | CD278     | IL-21R                    | TCR V $\alpha$ 3.2                  |                              |
| CD38       | CD90.1      | CD169        | CD279     | Integrin $\beta$ 7        | TCR V $\alpha$ 8.3                  |                              |
| CD39       | CD90.2      | CD178        | CD283     | Jagged 2                  | TCR V $\beta$ 11                    |                              |
| CD40       | CD93        | CD179a       | CD284/MD2 | JAML                      | TCR V $\beta$ 12                    |                              |
| CD41       | CD94        | CD180        | MAIR-V    | KLRG1                     | TCR V $\beta$ 13                    |                              |
| CD43       | CD96        | CD183        | CD309     | LAP                       | TCR V $\beta$ 2                     |                              |
| CD43       | CD98        | CD193        | NKG2D     | LPAM-1                    | TCR V $\beta$ 5.1, 5.2              |                              |
| CD44       | CD103       | CD194        | CD317     | LT beta R                 | TCR V $\beta$ 6                     |                              |
| CD45R/B220 | CD105       | CD195        | CD326     | Ly108                     | TCR V beta 7                        |                              |
| CD45       | CD106       | CD196        | CD335     | Ly-49A                    | TCR V $\beta$ 8                     |                              |
| CD45RB     | CD107a      | CD197        | CD351     | Ly-49C/F/I/H              | TCR V $\beta$ 9                     |                              |
| CD47       | Mac-3       | CD199        | CD355     | Ly49D                     | TCR V $\gamma$ 1.1                  |                              |
| CD48       | CD115       | CD200        | GITR      | Ly49G                     | TCR V $\gamma$ 1.1 + V $\gamma$ 1.2 |                              |

### Supplementary Table 2a: Cell Surface Antibody Reagents

| Protein         | Clone         | Manufacturer      | Metal Isotope | Conc. (µg/mL) | Catalog number |
|-----------------|---------------|-------------------|---------------|---------------|----------------|
| B220            | RA3-6B2       | BioLegend         | Pr141         | 2             | 103202         |
| CD11b           | M1/70         | BioLegend         | Nd142         | 0.5           | 101202         |
| CD11c           | N418          | BioLegend         | Nd143         | 8             | 117302         |
| CD194           | 2G12          | BioLegend         | Gd160         | 8             | 131202         |
| CD195           | HM-CCR5(7A4)  | eBioscience       | Gd155         | 8             | 14-1951-85     |
| CD200R          | OX2R          | BioLegend         | Yb172         | 8             | 123902         |
| CD206           | MR5D3         | AbD Serotec       | Er166         | 8             | MCA2235        |
| CD217 (IL-17RA) | PAJ-17R       | eBioscience       | Lu175         | 4             | 12-7182-82     |
| CD274           | B7-H1         | BioLegend         | Nd146         | 2             | 124302         |
| CD3             | 145-2C11      | BioLegend         | In113         | 4             | 100302         |
| CD38            | 90            | BioLegend         | Dy161         | 4             | 102702         |
| CD39            | Duha59        | BioLegend         | Er170         | 3             | 143802         |
| CD4             | RM4-5         | BioLegend         | Nd150         | 1             | 100506         |
| CD45            | 30-F11        | BioLegend         | Yb176         | 1             | 103102         |
| CD49d           | 9C10 (MFR4.B) | BioLegend         | Sm147         | 4             | 103708         |
| CD49e           | 5H10-27(MFR5) | BioLegend         | Nd148         | 4             | 103801         |
| CD80            | 16-101        | BD Pharmingen     | Er168         | 4             | 553766         |
| CD86            | GL-1          | BioLegend         | Tb159         | 4             | 105002         |
| H-2             | M1/42         | BioLegend         | Nd145         | 1             | 125502         |
| Ly6C            | HK1.4         | Novus Biologicals | Eu151         | 1             | NBP1-28046     |
| Ly6G            | 1A8           | BioLegend         | ce140         | 2             | 127632         |
| MHCII           | M5/114.15.2   | BioLegend         | In115         | 2             | 107602         |
| CD317 (PDCA-1)  | 120GB         | Novous /imgenx    | Eu153         | 4             | DDX0390-067    |
| TIM4            | Kat5-18       | Hycult Biotech    | Dy163         | 8             | 11550M0512     |
| MerTK           | Polyclonal    | R&D               | Dy162         | 4             | DGS0213111     |
| AXL             | Polyclonal    | R&D               | Er167         | 4             | CTC0213041     |
| TREM2           | 78.18         | BioRad            | Tm169         | 4             | 1113           |
| 4D4             |               | gift*             | Sm154         | 0.5           | Gift           |
| Fcrls           |               | gift*             | Sm152         | 2             | Gift           |
| GFP**           | FM264G        | BioLegend         | La139         | 4             | 338002         |

\*Gift from Dr. Butovsky

\*\* : Used for detection of YFP in CNS tissues from Cx3cr1<sup>CreER</sup> Rosa26-YFP

### Supplementary Table 2b: Signaling Antibodies, Apoptotic and Proliferative Markers

| Protein     | Clone         | Manufacturer   | Metal Isotope | Conc. (µg/mL) | Catalog number |
|-------------|---------------|----------------|---------------|---------------|----------------|
| C/EBPα      | D56F10        | CST            | Ho165         | 4             | 8178S          |
| C/EBPβ      | E299          | Abcam          | Dy164         | 4             | ab32358        |
| pCREB       | 87G3          | CST            | Yb174         | 1             | 9198BF         |
| pSTAT1      | 58D6          | CST            | Gd155         | 4             | 9167BF         |
| pSTAT3      | 4/P-STAT3     | DVS            | Gd158         | 1             | 3158005A       |
| pSTAT5      | 47            | BD Pharmingen  | Nd144         | 1             | 624084         |
| NF-κB (p65) | K10-895.12.50 | BD Pharmingen  | Yb171         | 4             | 558393         |
| MAPKAPK2    | 27B7          | CST            | Yb173         | 1             | 3007BF         |
| cPARP       | F21-852       | BD Pharmingen  | La139         | 1             | 519000017      |
| Ki-67       | B56           | BD Biosciences | Sm152         | 1             | 556003         |

### Supplementary Table 2c: Cytokine Antibodies

| Protein  | Clone        | Manufacturer   | Metal Isotope | Conc. (µg/mL) | Catalog number |
|----------|--------------|----------------|---------------|---------------|----------------|
| GM-CSF   | MP1-22E9     | BioLegend      | Dy164         | 4             | 505402         |
| IFN-a    | F1           | Hycult Biotech | Yb173         | 4             | HM1001         |
| IFN-g    | XMG1.2       | DVS            | Ho165         | 4             | 3165003B       |
| IL-10    | JES5-16E3    | DVS            | Gd158         | 4             | 3158002B       |
| IL-17A   | TC11-18H10.1 | DVS            | Tm169         | 4             | 3169005B       |
| IL-6     | MP5-20F3     | DVS            | Er167         | 4             | 3167003B       |
| TGF-beta | 19D8         | BioLegend      | Yb171         | 4             | 521704         |
| TNF-a    | MP6-XT22     | DVS            | Dy162         | 2             | 3162002B       |
